# Supplementary material
Source: PubMed Central journal article supplement (PMC3285314)
Supplement: supp_M111.286856_Supplemental_Tables.pdf [file supp_M111.286856_Supplemental_Tables.pdf]

1 **Supplementary Table 1.** Oligonucleotides used in this study

| Name           | Sequence 5'-3'                                                                                | Enzyme |
|----------------|-----------------------------------------------------------------------------------------------|--------|
| mazEFpSE100 F  | AAATTTGGATCCGGAGGGAATAATGACTCCC <span style="text-decoration: underline;">GCGCGTGA</span> CCG | BamHI  |
| mazFpSE100 F   | AAATTTGGATCCGGAGGGAATAGTGC <span style="text-decoration: underline;">GGCGCGGCGATA</span> TCTA | BamHI  |
| mazFpSE100 R   | AAATTTCTGCAGCGTGCCGAAGCAGGTGGTCA                                                              | PstI   |
| phd/docpMind F | AAATTTGGATCCGGAGGGAATAATGCCGTCGCTGAACATCGA                                                    | BamHI  |
| docpMind F     | AAATTTGGATCCGGAGGGAATAGTGACCGAGTACCTCGACCG                                                    | BamHI  |
| docpMind R     | AAATTTACTAGTGGCCGCGCTACCAAAGTTCA                                                              | SpeI   |
| mazRT-PCR1 F   | GCGCTGCAGGAGACGTTCCA                                                                          |        |
| mazRT-PCR2 F   | TGACCGAGTACGCCGACATC                                                                          |        |
| mazRT-PCR3 R   | AAGCTGGAGCGGGGAACTGT                                                                          |        |
| docRT-PCR1 F   | TGGCAATGGCATCCAACATG                                                                          |        |
| docRT-PCR2 F   | ACCTGTCGCTGAAGAAGTTCC                                                                         |        |
| docRT-PCR3 R   | TGGAATCCAGGTCGCAGTCA                                                                          |        |
| docRT-PCR4 R   | CCTGCTCTGAAGGTTGACGA                                                                          |        |
| mazF RACE1 R   | TCC CAG AAA AAC CAG GAG TG                                                                    |        |
| mazE RACE2 R   | CGT CGA CGA AAG CTT GAT CT                                                                    |        |
| doc RACE1 R    | ACA CCG TTG ATG TGC AGA AA                                                                    |        |
| phd RACE2 R    | GTT GAG CTC AGC CGA ACG                                                                       |        |
| mazElac F      | AAATTTGGATCCTTCGCCGAATACACCACGAT                                                              | BamHI  |
| mazElac R      | AAATTTGGTACCCGAAATTCGGGTGCATTAC                                                               | Asp718 |
| phdlac F       | AAATTTAGTACTAAGCTGGACGAGGAGGTTGC                                                              | ScaI   |
| phdlac R       | AAATTTAGTACTGAAGTCTTCAGCGACAGGT                                                               | ScaI   |
| mazEFKOLF F    | AAATTTACTAGTCCTCATCGTCGATGTCGTGT                                                              | SpeI   |
| mazEFKOLF R    | CAGGAGTGATGTCGGCGTACTCGGTCA                                                                   |        |
| mazEFKORF F    | CGACATCACTCCTGGTTTTTCTGGGAA                                                                   |        |
| mazEFKORF R    | AAATTTACTAGTTACCACGATGGGCGGATTGT                                                              | SpeI   |
| phd/docKOLF F  | AAATTTACTAGTGTGCGATGTCGACCGACAGT                                                              | SpeI   |
| phd/docKOLF R  | AAATTTGAATTCGAAGTCTTCAGCGACAGGT                                                               | EcoRI  |
| phd/docKORF F  | AAATTTCTGCAGTGACTGCGACCTGGATTCCA                                                              | PstI   |
| phd/docKORF R  | AAATTTACTAGTTCGTGATGGATGCGACGTAT                                                              | SpeI   |
| 3' mespUC R    | GTTTTCCCAGTCACGACGTT                                                                          |        |
| 5' mespUC F    | CACACAGGAAACAGCTATGA                                                                          |        |
| MSMEG_1277 F   | GAAGCCGAGATGGAACAGAT                                                                          |        |
| MSMEG_1277 R   | GTTGAGCTCAGCCGAACG                                                                            |        |

|                 |                       |  |
|-----------------|-----------------------|--|
| R               |                       |  |
| MSMEG_1279<br>F | AATGCCTCGTTGGTCTTGTC  |  |
| MSMEG_1279<br>R | TAGTGCACTTCGTCGTCACC  |  |
| MSMEG_1280<br>F | GGAGACCACCATCAGGAAGA  |  |
| MSMEG_1280<br>R | GATCTCGGCGTACTGGAGTC  |  |
| MSMEG_1281<br>F | GCGGGATATCGACTCCAGTA  |  |
| MSMEG_1281<br>R | TTGTTGTAAGCGGCTTTGTG  |  |
| MSMEG_1282<br>F | ATACCCATGGATTTGCGATT  |  |
| MSMEG_1282<br>R | CGGTAGAGCTGCTGTTCCCTC |  |

2

3 **Supplementary Table 2.** Specific growth rates ( $h^{-1}$ )<sup>a</sup> of TA deletion strains

| <b><i>Growth medium</i></b>  | <b>Wild-type</b>     | <b>RF100</b>         | <b>RF101</b>         | <b>RF105</b>         |
|------------------------------|----------------------|----------------------|----------------------|----------------------|
| <b>LBT</b>                   | 0.27 ( $\pm 0.009$ ) | 0.27 ( $\pm 0.008$ ) | 0.25 ( $\pm 0.007$ ) | 0.25 ( $\pm 0.012$ ) |
| <b>HdB</b>                   | 0.27 ( $\pm 0.011$ ) | 0.26 ( $\pm 0.010$ ) | 0.24 ( $\pm 0.020$ ) | 0.25 ( $\pm 0.015$ ) |
| <b>Carbon Limited HdB</b>    | 0.25 ( $\pm 0.020$ ) | 0.23 ( $\pm 0.009$ ) | 0.26 ( $\pm 0.006$ ) | 0.18 ( $\pm 0.028$ ) |
| <b>Nitrogen Limited HdB</b>  | 0.23 ( $\pm 0.010$ ) | 0.20 ( $\pm 0.015$ ) | 0.19 ( $\pm 0.014$ ) | 0.18 ( $\pm 0.004$ ) |
| <b>Phosphate Limited HdB</b> | 0.23 ( $\pm 0.018$ ) | 0.23 ( $\pm 0.006$ ) | 0.20 ( $\pm 0.004$ ) | 0.21 ( $\pm 0.024$ ) |

4 <sup>a</sup> The specific growth rate constant ( $h^{-1}$ ) for the log phase of growth is reported. Results are  
5 shown as mean  $\pm$  SD for three biological replicates.

6

7

8 **Supplementary Table 3.** Differentially regulated genes from day 1 microarray analysis.

| Locus                | Gene Name                                                         | Functional Category                                        | Fold Change | <i>p</i> -value      |
|----------------------|-------------------------------------------------------------------|------------------------------------------------------------|-------------|----------------------|
| <b>Downregulated</b> |                                                                   |                                                            |             |                      |
| MSMEG_1283           | Probable ribbon-helix-helix transcriptions factor, family protein | Regulatory functions                                       | 0.0983      | 8.6x10 <sup>-6</sup> |
| MSMEG_1284           | PIN domain protein                                                | Unknown function                                           | 0.147       | 9.8x10 <sup>-4</sup> |
| MSMEG_1278           | Death-on-curing protein                                           | Mobile and extrachromosomal element functions              | 0.248       | 0.0042               |
| MSMEG_4447           | Conserved hypothetical protein                                    | Hypothetical proteins                                      | 0.263       | 0.0088               |
| MSMEG_4448           | Transcriptional modulator of MazE                                 | Cellular processes                                         | 0.361       | 0.011                |
| MSMEG_3771           | Arginine repressor ( <i>argR</i> )                                | Amino acid biosynthesis                                    | 0.479       | 0.0089               |
| MSMEG_1999           | Hypothetical protein                                              | Hypothetical proteins                                      | 0.491       | 0.011                |
| <b>Upregulated</b>   |                                                                   |                                                            |             |                      |
| MSMEG_1279           | Conserved hypothetical protein                                    | Hypothetical protein                                       | 65.85       | 0.041                |
| MSMEG_1275           | HNH nuclease, putative                                            | DNA metabolism                                             | 12.92       | 0.0048               |
| MSMEG_1280           | Hypothetical cytosolic protein                                    | Energy metabolism                                          | 11.74       | 5.4x10 <sup>-4</sup> |
| MSMEG_1281           | Conserved hypothetical protein                                    | Hypothetical proteins                                      | 5.82        | 0.0019               |
| MSMEG_4451           | Probable monooxygenase                                            | Biosynthesis of cofactors, prosthetic groups, and carriers | 3.81        | 0.027                |
| MSMEG_1282           | Hypothetical cytosolic protein                                    | Energy metabolism                                          | 2.65        | 0.0031               |
| MSMEG_4831           | Transcriptional regulator, TetR family protein                    | Regulatory functions                                       | 2.56        | 0.048                |
| MSMEG_0418           | Succinate dehydrogenase flavoprotein subunit                      | Energy metabolism                                          | 2.49        | 0.019                |
| MSMEG_5165           | Integral membrane protein                                         | Cell envelope                                              | 2.30        | 0.020                |
| MSMEG_5166           | Na <sup>+</sup> /solute symporter                                 | Transport and binding                                      | 2.14        | 0.0047               |
| MSMEG_5021           | Alcohol dehydrogenase, zinc-containing                            | Energy metabolism                                          | 2.10        | 0.014                |
| MSMEG_5022           | Flavin-containing monooxygenase FMO                               | Energy metabolism                                          | 2.08        | 0.017                |

9

10

11 **Supplementary Table 4.** Differentially regulated genes from day 5 microarray analysis.

| Locus                | Gene Name                                                                        | Functional Category                    | Fold Change | p-value              |
|----------------------|----------------------------------------------------------------------------------|----------------------------------------|-------------|----------------------|
| <b>Upregulated</b>   |                                                                                  |                                        |             |                      |
| MSMEG_1280           | Hypothetical cytosolic protein                                                   | Energy metabolism                      | 17.36       | 0.045                |
| MSMEG_6236           | Two-component system, regulatory protein                                         | Regulatory functions                   | 6.06        | 0.046                |
| MSMEG_1275           | HNH nuclease, putative                                                           | DNA metabolism                         | 5.49        | 0.042                |
| <b>Downregulated</b> |                                                                                  |                                        |             |                      |
| MSMEG_1770           | Conserved hypothetical protein                                                   | Hypothetical proteins                  | 0.223       | 1.5x10 <sup>-4</sup> |
| MSMEG_1771           | Methylase, putative                                                              | Unknown function                       | 0.229       | 0.0013               |
| MSMEG_1076           | Conserved hypothetical protein                                                   | Hypothetical proteins                  | 0.276       | 6.1x10 <sup>-5</sup> |
| MSMEG_3439           | Hypothetical protein                                                             | Hypothetical proteins                  | 0.282       | 6.6x10 <sup>-4</sup> |
| MSMEG_0795           | ABC transporter ATP-binding protein                                              | Transport and binding                  | 0.282       | 0.0053               |
| MSMEG_6212           | Hemerythrin HHE cation binding domain subfamily protein, putative                | Unknown function                       | 0.295       | 0.0014               |
| MSMEG_3776           | N-acetyl-gamma-glutamyl-phosphate reductase                                      | Amino acid biosynthesis                | 0.322       | 0.0041               |
| MSMEG_1919           | Transcription factor WhiB                                                        | Unknown function                       | 0.323       | 4.1x10 <sup>-4</sup> |
| MSMEG_2755           | Conserved hypothetical protein                                                   | Hypothetical proteins                  | 0.334       | 0.0061               |
| MSMEG_5388           | Conserved hypothetical protein                                                   | Hypothetical proteins                  | 0.345       | 0.0014               |
| MSMEG_2016           | Molybdate ABC transporter, periplasmic molybdate-binding protein ( <i>modA</i> ) | Transport and binding                  | 0.346       | 0.013                |
| MSMEG_1790           | Conserved hypothetical protein                                                   | Hypothetical proteins                  | 0.352       | 4.5x10 <sup>-4</sup> |
| MSMEG_0732           | Chaperone ClpB                                                                   | Cellular processes                     | 0.355       | 0.010                |
| MSMEG_5011           | Hypothetical protein                                                             | Hypothetical proteins                  | 0.359       | 0.0065               |
| MSMEG_0230           | Conserved hypothetical protein                                                   | Hypothetical proteins                  | 0.364       | 0.023                |
| MSMEG_5039           | Siderophore-interacting protein                                                  | Unclassified                           | 0.368       | 0.0042               |
| MSMEG_5352           | Conserved hypothetical protein                                                   | Hypothetical proteins                  | 0.370       | 0.0061               |
| MSMEG_2927           | ABC transporter, permease protein OpuCB                                          | Unclassified                           | 0.371       | 0.011                |
| MSMEG_6456           | Conserved hypothetical protein                                                   | Hypothetical proteins                  | 0.374       | 0.0044               |
| MSMEG_5010           | Conserved hypothetical protein                                                   | Hypothetical proteins                  | 0.377       | 0.013                |
| MSMEG_3068           | Hypothetical protein                                                             | Hypothetical proteins                  | 0.377       | 0.017                |
| MSMEG_3613           | Conserved hypothetical protein                                                   | Hypothetical proteins                  | 0.382       | 0.021                |
| MSMEG_1788           | Conserved hypothetical protein                                                   | Hypothetical proteins                  | 0.384       | 0.0056               |
| MSMEG_2422           | Acylphosphatase                                                                  | Fatty acid and phospholipid metabolism | 0.385       | 0.0044               |
| MSMEG_5328           | Conserved hypothetical protein                                                   | Hypothetical proteins                  | 0.392       | 0.0037               |
| MSMEG_6092           | Lsr2 protein                                                                     | Cellular processes                     | 0.393       | 0.0029               |
| MSMEG_1773           | Conserved hypothetical protein                                                   | Hypothetical proteins                  | 0.397       | 0.0051               |

|            |                                                                |                                                          |       |        |
|------------|----------------------------------------------------------------|----------------------------------------------------------|-------|--------|
| MSMEG_5904 | Conserved domain protein                                       | Hypothetical proteins                                    | 0.398 | 0.0088 |
| MSMEG_0394 | Hypothetical protein                                           | Hypothetical proteins                                    | 0.401 | 0.0083 |
| MSMEG_4479 | Conserved hypothetical protein                                 | Hypothetical proteins                                    | 0.402 | 0.011  |
| MSMEG_1561 | LysR-family protein<br>transcriptional regulator               | Regulatory functions                                     | 0.405 | 0.022  |
| MSMEG_1410 | Carveol dehydrogenase                                          | Energy metabolism                                        | 0.410 | 0.011  |
| MSMEG_2038 | Monooxygenase, flavin-binding<br>family protein                | Central intermediary<br>metabolism                       | 0.411 | 0.0068 |
| MSMEG_2975 | Metallo-beta-lactamase family<br>protein                       | Unknown function                                         | 0.411 | 0.024  |
| MSMEG_2687 | Carveol dehydrogenase                                          | Energy metabolism                                        | 0.417 | 0.017  |
| MSMEG_4752 | Conserved hypothetical protein                                 | Hypothetical proteins                                    | 0.424 | 0.0090 |
| MSMEG_5720 | Putative 3-hydroxyacyl-CoA<br>dehydrogenase                    | Unclassified                                             | 0.428 | 0.032  |
| MSMEG_1777 | UspY protein                                                   | Unclassified                                             | 0.429 | 0.010  |
| MSMEG_3600 | Hypothetical protein                                           | Hypothetical proteins                                    | 0.430 | 0.022  |
| MSMEG_4184 | dtg-gluco-46-dehydratase                                       | Cell envelope                                            | 0.430 | 0.016  |
| MSMEG_0434 | Aminoglycoside 2'-N-<br>acetyltransferase (AAC(2')-Id)         | Central intermediary<br>metabolism                       | 0.430 | 0.021  |
| MSMEG_3863 | Pyridoxamine 5'-phosphate<br>oxidase family protein            | Unknown function                                         | 0.442 | 0.0082 |
| MSMEG_3685 | Conserved hypothetical protein                                 | Hypothetical proteins                                    | 0.448 | 0.0048 |
| MSMEG_3918 | Hypothetical protein                                           | Hypothetical proteins                                    | 0.448 | 0.015  |
| MSMEG_3004 | Conserved hypothetical protein<br>TIGR00026                    | Hypothetical proteins                                    | 0.448 | 0.042  |
| MSMEG_5081 | Conserved hypothetical protein                                 | Hypothetical proteins                                    | 0.451 | 0.010  |
| MSMEG_1808 | Fe-S metabolism associated<br>SufE                             | DNA metabolism                                           | 0.453 | 0.015  |
| MSMEG_6739 | Hypothetical protein                                           | Hypothetical proteins                                    | 0.457 | 0.031  |
| MSMEG_4765 | Transcriptional regulator, MerR<br>family protein              | Regulatory functions                                     | 0.458 | 0.028  |
| MSMEG_0309 | Aldehyde dehydrogenase family<br>protein                       | Energy metabolism                                        | 0.460 | 0.018  |
| MSMEG_2688 | Antibiotic biosynthesis<br>monooxygenase domain protein        | Cellular processes                                       | 0.465 | 0.010  |
| MSMEG_4361 | Conserved hypothetical protein                                 | Hypothetical proteins                                    | 0.466 | 0.0073 |
| MSMEG_0358 | Ribonucleoside-diphosphate<br>reductase, beta subunit          | Purines, pyrimidines,<br>nucleosides, and<br>nucleotides | 0.468 | 0.0067 |
| MSMEG_2451 | HAD-superfamily protein<br>hydrolase, subfamily protein<br>IIA | Unknown function                                         | 0.469 | 0.042  |
| MSMEG_6410 | Rieske 2Fe-2S family protein                                   | Energy metabolism                                        | 0.472 | 0.013  |
| MSMEG_3371 | Short-chain<br>dehydrogenase/reductase SDR                     | Central intermediary<br>metabolism                       | 0.472 | 0.026  |

|            |                                                    |                                        |       |        |
|------------|----------------------------------------------------|----------------------------------------|-------|--------|
|            | (region contains premature stop and/or frameshift) |                                        |       |        |
| MSMEG_1789 | Conserved hypothetical protein                     | Hypothetical proteins                  | 0.473 | 0.0029 |
| MSMEG_4476 | Hypothetical protein                               | Hypothetical proteins                  | 0.478 | 0.0066 |
| MSMEG_2026 | Short chain dehydrogenase                          | Energy metabolism                      | 0.480 | 0.027  |
| MSMEG_0558 | Conserved hypothetical protein                     | Hypothetical proteins                  | 0.484 | 0.020  |
| MSMEG_3542 | Conserved hypothetical protein                     | Hypothetical proteins                  | 0.484 | 0.010  |
| MSMEG_2754 | Conserved hypothetical protein                     | Hypothetical proteins                  | 0.488 | 0.013  |
| MSMEG_5292 | Hypothetical protein                               | Hypothetical proteins                  | 0.489 | 0.0085 |
| MSMEG_1414 | Amidino transferase                                | Unclassified                           | 0.489 | 0.048  |
| MSMEG_4920 | Acetyl-CoA acetyltransferase                       | Fatty acid and phospholipid metabolism | 0.491 | 0.015  |
| MSMEG_3156 | Conserved hypothetical protein                     | Hypothetical proteins                  | 0.494 | 0.032  |
| MSMEG_0119 | Conserved hypothetical protein                     | Hypothetical proteins                  | 0.497 | 0.034  |
| MSMEG_4921 | Methylmalonyl-CoA epimerase ( <i>mce</i> )         | Energy metabolism                      | 0.499 | 0.033  |
| MSMEG_4904 | Rhomboid family protein                            | Unknown function                       | 0.500 | 0.040  |

12

13
