# Supplementary material
Source: PubMed Central journal article supplement (PMC3285314)
Supplement: supp_M111.286856_SUPPLEMENTARY_FIGURE_LEGENDS.pdf [file supp_M111.286856_SUPPLEMENTARY_FIGURE_LEGENDS.pdf]

## SUPPLEMENTARY FIGURE LEGENDS

**Supplementary Fig. 1. Long-term survival of single and double TA deletion strains in LBT.** Cultures of the wild type, single, double and triple TA deletion strains were grown in LBT for 25 days then samples were taken to determine surviving CFUs. Results are shown as the mean  $\pm$  SD of three biological replicates.

**Supplementary Fig. 2. Phenotypic analysis of  $\Delta mazEF\Delta vapBC\Delta phd/doc$  (RF105)** (a) Wild type and  $\Delta mazEF\Delta vapBC\Delta phd/doc$  (RF105) survival in serum vials containing HdB was measured over 30 days. (b) Wild type and  $\Delta mazEF\Delta vapBC\Delta phd/doc$  (RF105) survival in serum vials containing LBT was measured over 30 days. As the cultures grew in serum vials the oxygen level is depleted by the cells resulting in a hypoxic condition. Wild type and  $\Delta mazEF\Delta vapBC\Delta phd/doc$  (RF105) cultures were grown in (c) HdB or (d) LBT to mid-exponential phase. The cells were collected by centrifugation, washed in PBST and resuspended in PBST. The survival under these starvation conditions was measured over 7 days. Wild type and  $\Delta mazEF\Delta vapBC\Delta phd/doc$  (RF105) cultures were grown in (e) HdB or (f) LBT to stationary phase. The cells were collected by centrifugation, washed in PBST and resuspended in PBST. The survival under these starvation conditions was measured over 7 days. (g) Long term survival of wild type and  $\Delta mazEF\Delta vapBC\Delta phd/doc$  (RF105) in 7H9 and 7H9 + 10% ADC was measured after 25 days incubation. Results are shown as the mean  $\pm$  SD of (c, d, e, f, and g) two or (a and b) three biological replicates.
