# Supplementary material
Source: PubMed Central journal article supplement (PMC3285314)

# Supplementary Figure 1

## Long Term Survival of TA Deletion Strains in LBT

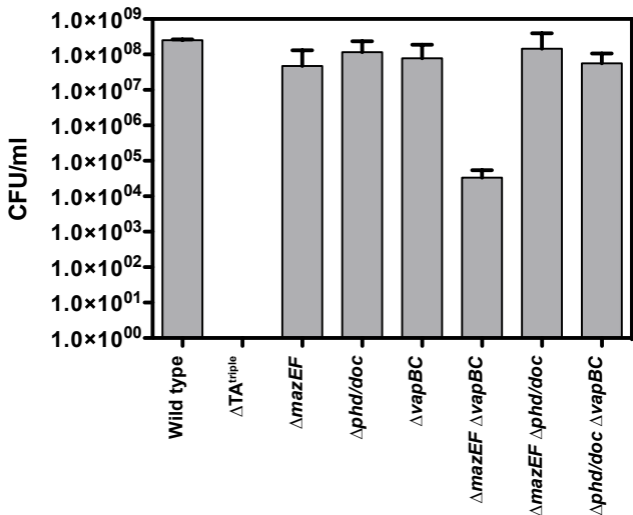

# Supplementary Figure 2

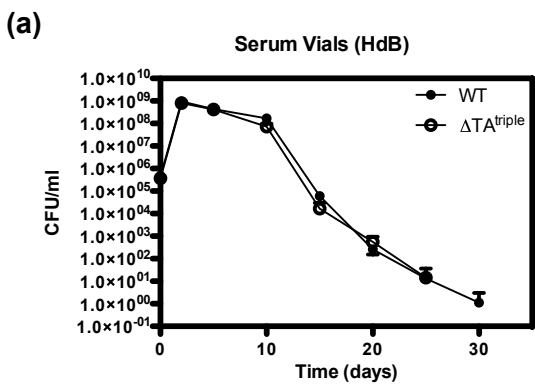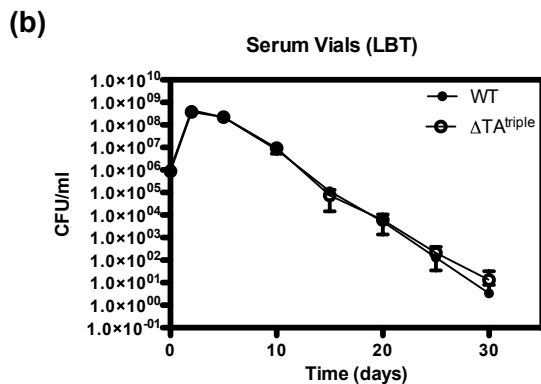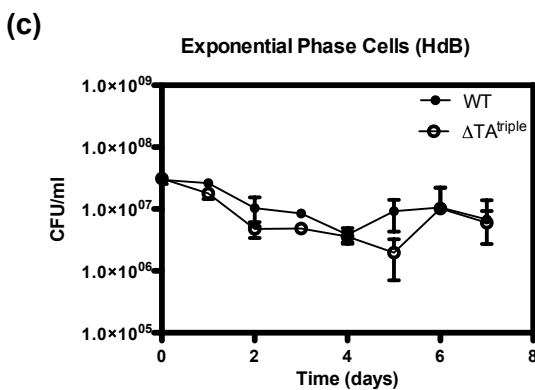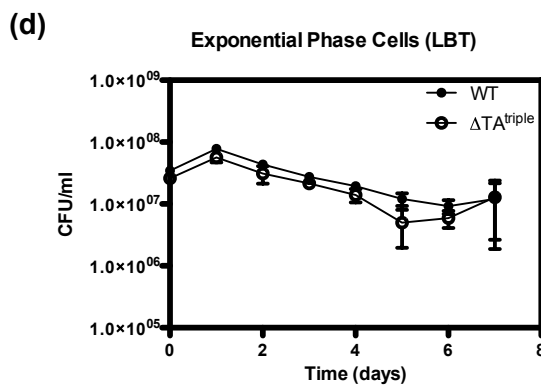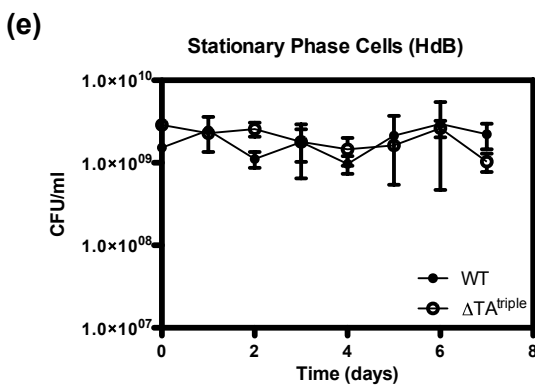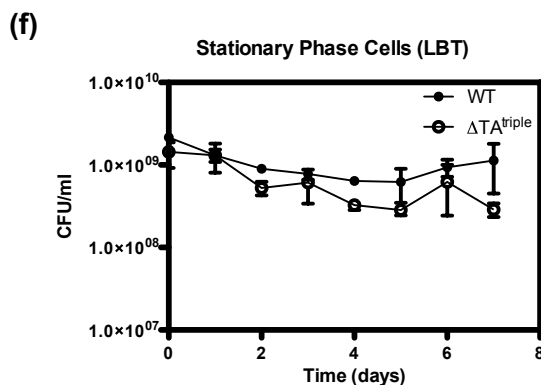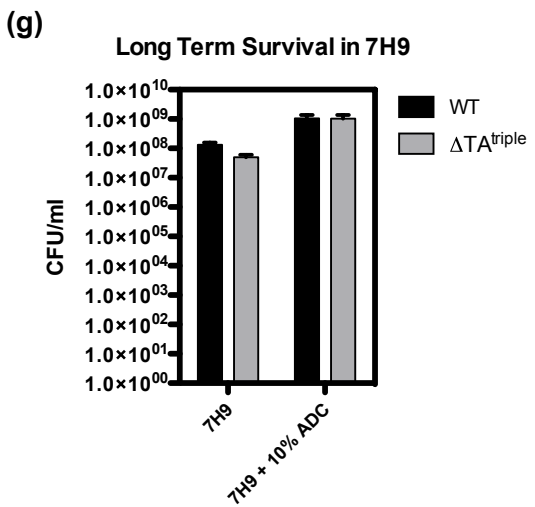

Supplement: supp_M111.286856_SupplPaperFigure1-2.pdf [file supp_M111.286856_SupplPaperFigure1-2.pdf]
